# Supplementary material for: A facile method for preparation of uniform polymeric vesicles with tunable size
Source: Royal Society of Chemistry journal article supplement (doi:10.1039/c8nr02901f), 2018-01-01
Supplement: c8nr02901f1.pdf [file c8nr02901f1.pdf]

## Electronic Supplementary Information

### A Facile Method for Preparation of Uniform Polymeric Vesicles with Tunable Size

Ming Wu<sup>ab</sup>, Yingying Wang<sup>ab</sup>, Yuanyuan Han<sup>\*a</sup>, Jie Cui<sup>a</sup> and Wei Jiang<sup>\*a</sup>

*<sup>a</sup>State Key Laboratory of Polymer Physics and Chemistry, Changchun Institute of Applied Chemistry, Chinese Academy of Sciences, Changchun 130022, People's Republic of China*

*<sup>b</sup>University of Chinese Academy of Sciences, Beijing 100049, People's Republic of China*

**Keywords:** block copolymer, self-assembly, polymeric vesicles, size uniformity, Monte Carlo simulation.

\*E-mail: [wjiang@ciac.ac.cn](mailto:wjiang@ciac.ac.cn).

\*E-mail: [yyhan@ciac.ac.cn](mailto:yyhan@ciac.ac.cn).

**SUPPORTING FIGURES:**

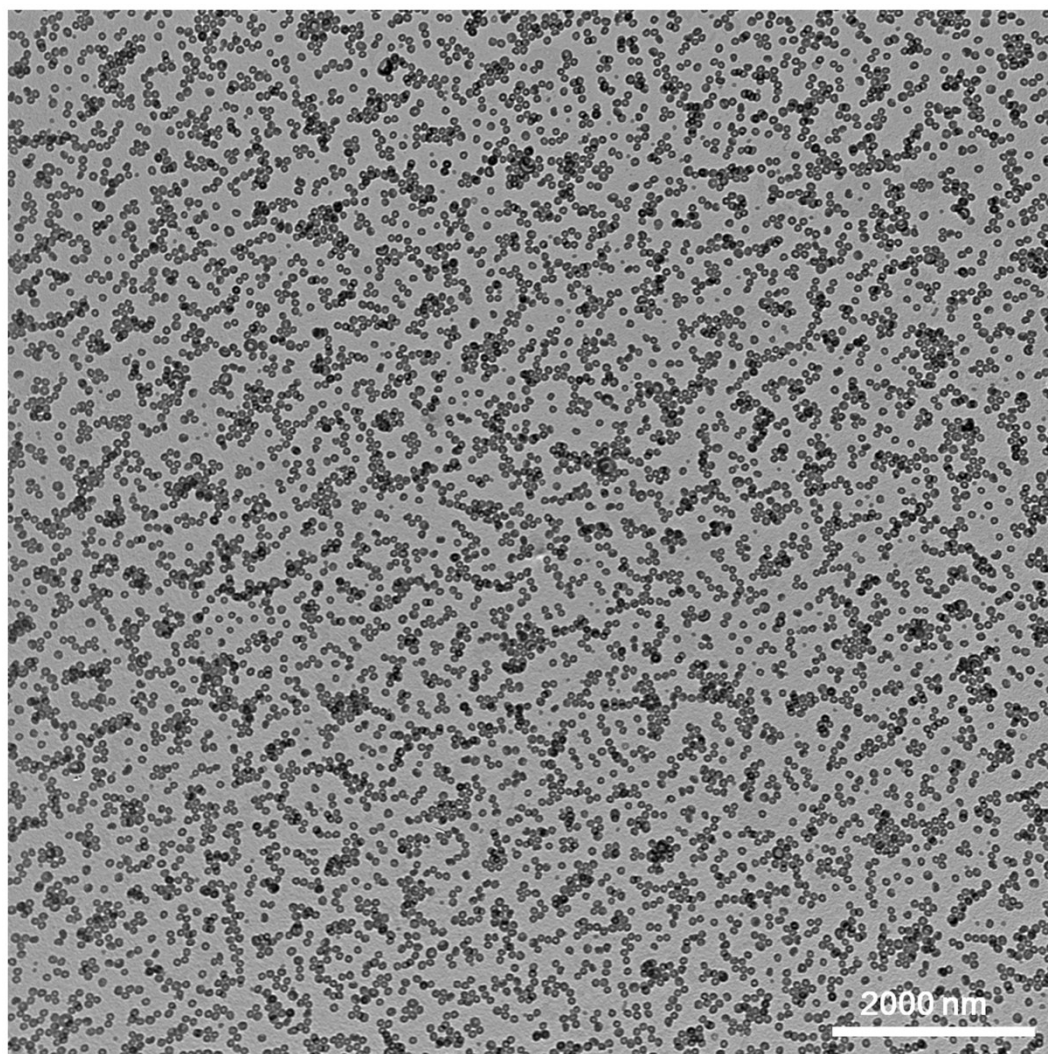

**Fig. S1** Low magnified TEM image of the uniform polymeric vesicles formed from the P4VP<sub>77</sub>-*b*-PS<sub>318</sub> at the selective solvent content of 34 %.

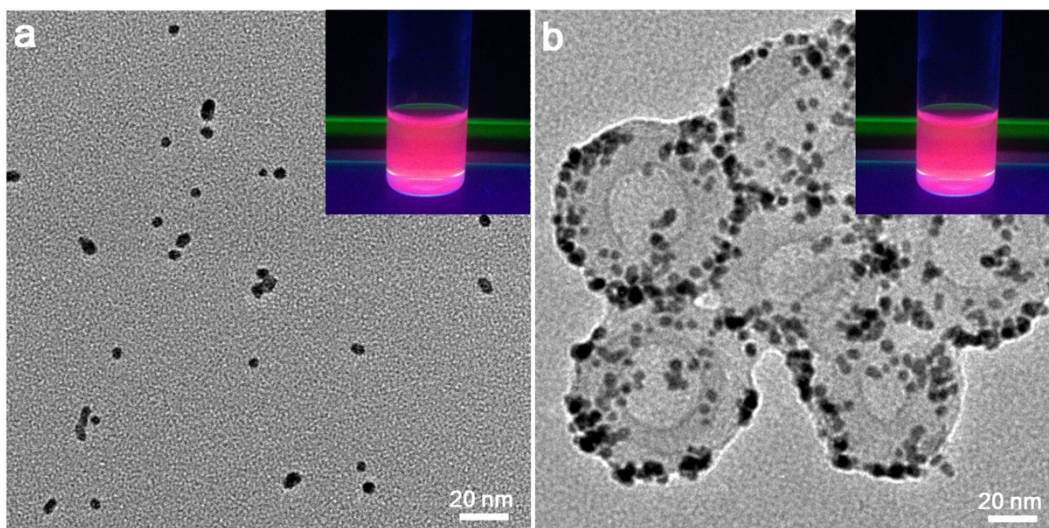

**Fig. S2** High resolution TEM images of (a) the free CdSe QDs and (b) the bound QDs in the outer surface of the polymeric vesicles. The insets are the corresponding digital photographs for the QDs solutions under ultraviolet light (365 nm).

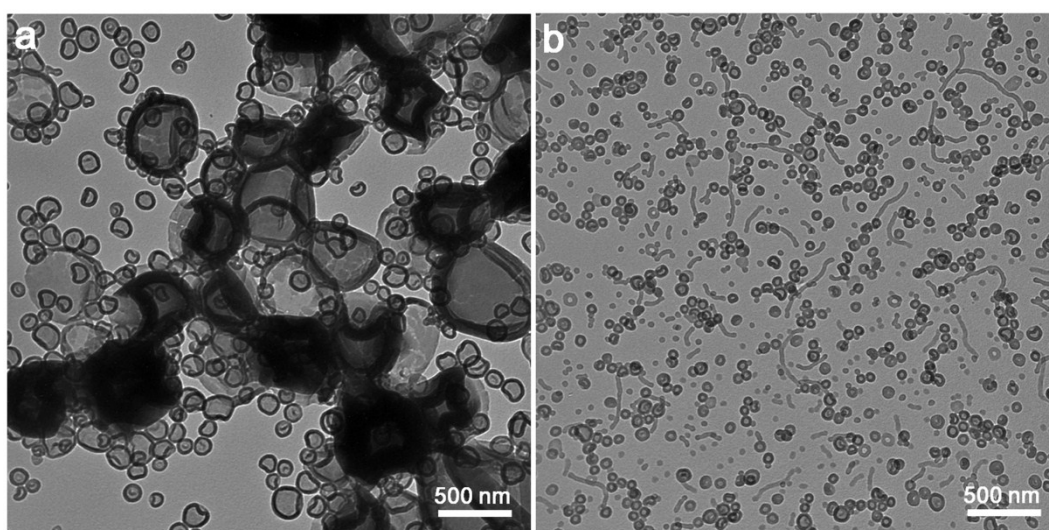

**Fig. S3** TEM images of the aggregate morphologies formed from the P4VP<sub>77</sub>-*b*-PS<sub>318</sub> at different selective solvent contents: (a) 30 %, (b) 37 %.

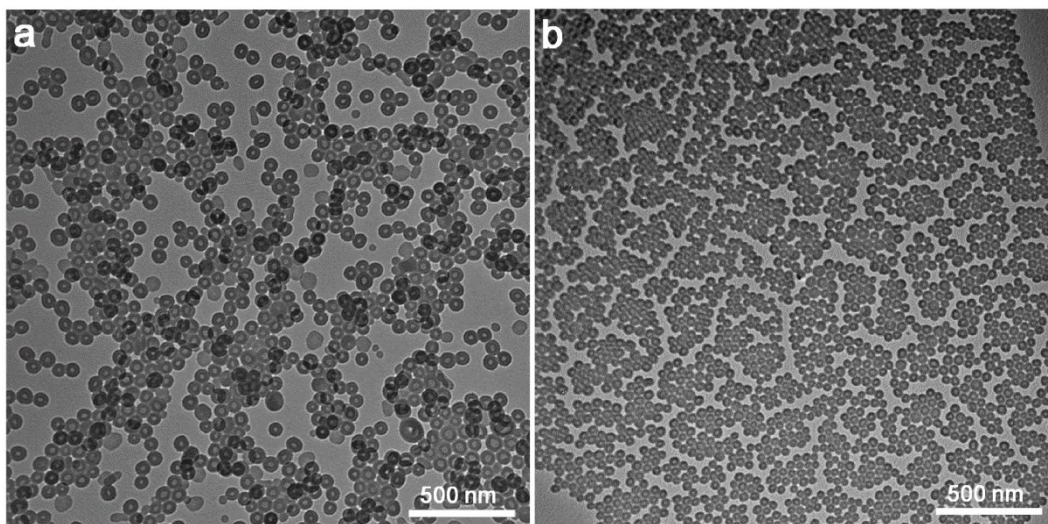

**Fig. S4** TEM images of the uniform polymeric vesicles formed from (a) the P4VP<sub>43</sub>-*b*-PS<sub>366</sub>-*b*-P4VP<sub>43</sub> at the selective solvent content of 34 % and (b) the PS<sub>144</sub>-*b*-PAA<sub>22</sub> at the selective solvent content of 24 %.

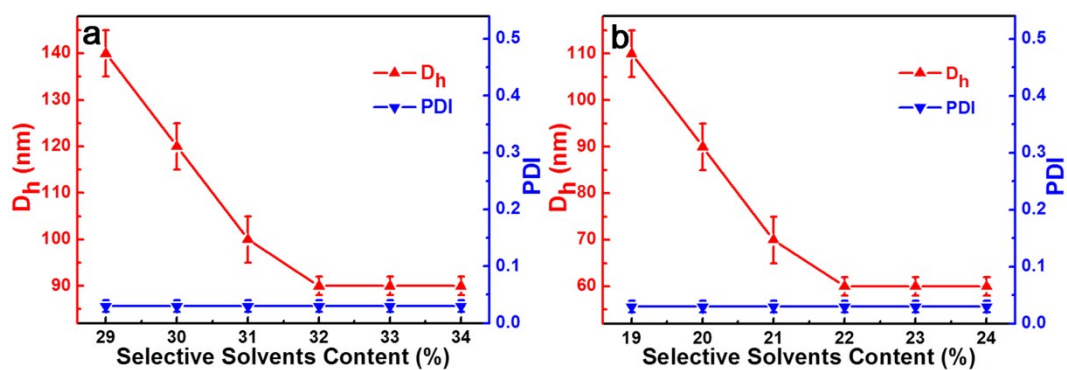

**Fig. S5** DLS results of the uniform polymeric vesicles formed from (a) the P4VP<sub>43</sub>-*b*-PS<sub>366</sub>-*b*-P4VP<sub>43</sub> and (b) the PS<sub>144</sub>-*b*-PAA<sub>22</sub> at different selective solvent contents.

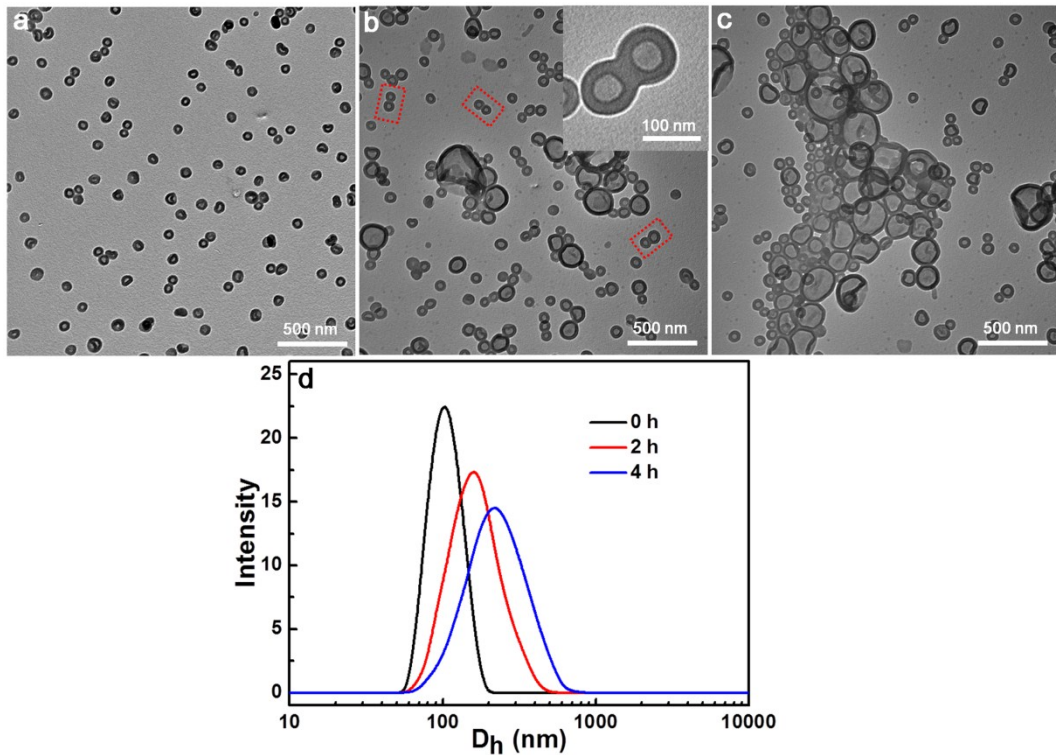

**Fig. S6** TEM images of the uniform polymeric vesicles formed from the P4VP<sub>77</sub>-*b*-PS<sub>318</sub> at the selective solvent content of 34 % with different stirring time: (a) 0 h, (b) 2 h, (c) 4 h. (d) The corresponding DLS results.

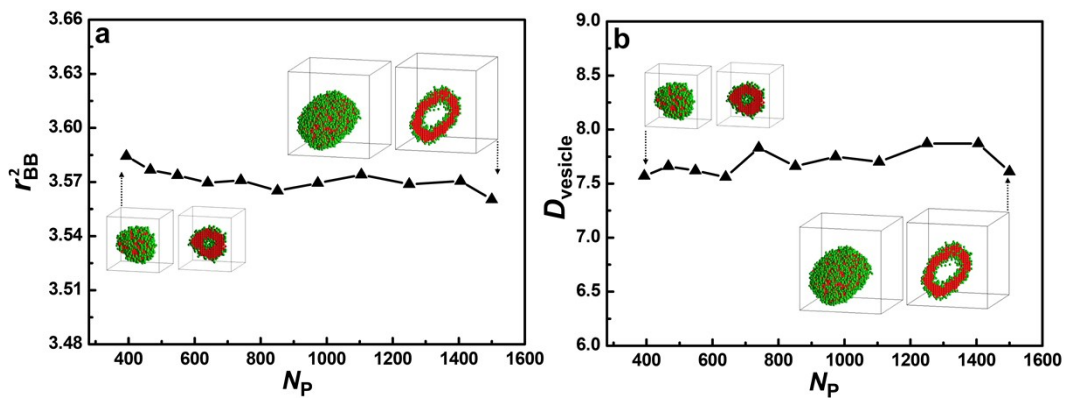

**Fig. S7** Simulation results of the variations of (a) the mean square end-to-end distance of the hydrophobic blocks B ( $r_{BB}^2$ ) in each vesicle and (b) the vesicle wall thickness ( $D_{\text{vesicle}}$ ) with vesicle sizes ( $N_p$ ). The micelle morphologies and their cross sections for corresponding  $N_p$  are also given for the purpose of clarity. The interaction between blocks B and solvents is  $\epsilon_{BS} = 0.16$ .
